# Supplementary material
Source: PubMed Central journal article supplement (PMC7332666)
Supplement: mmc1.pdf [file mmc1.pdf]

**Supplemental Data**

**Homozygous Mutations in *BTG4* Cause Zygotic  
Cleavage Failure and Female Infertility**

**Wei Zheng, Zhou Zhou, Qianqian Sha, Xiangli Niu, Xiaoxi Sun, Juanzi Shi, Lei Zhao, Shuoping Zhang, Jing Dai, Sufen Cai, Fei Meng, Liang Hu, Fei Gong, Xiaoran Li, Jing Fu, Rong Shi, Guangxiu Lu, Biaobang Chen, Hengyu Fan, Lei Wang, Ge Lin, and Qing Sang**

Table S1: Primer sequences for qRT-PCR

|              | Forward Primer Sequences (5'-3') | Reverse Primer Sequences (5'-3') |
|--------------|----------------------------------|----------------------------------|
| <i>ZP3</i>   | TCCAGGCAGAAATCCACACT             | AACTGGAGTGTATCTGGCCC             |
| <i>TOMM7</i> | AAAGAGGCCAAGCAGAGACT             | CACATCTTCCATGCTGTCCG             |
| <i>EIF3F</i> | ATCCACGAGTACTACAGCCG             | CGATGCGTTCAGTGTCGTAG             |
| <i>CKS1B</i> | TAAGCTGAGTGTGACCCCAG             | AAATCCGCAAGTCACCACAC             |
| <i>UCHL1</i> | AATGCCTTTTCCGGTGAACC             | AATCAGCAAAGTCCCTCCCA             |
| <i>TACC3</i> | TGAAGAAGTGCGTGGAGGAT             | CTGCTCCACTGTCTTCTCCA             |
| <i>CSTB</i>  | TGAGGTCCCAGCTTGAAGAG             | TGCTTGGCTTTGTTGGTCTG             |
